# Supplementary material
Source: PubMed Central journal article supplement (PMC2710675)
Supplement: 0904991106_0904991106SI.pdf [file 0904991106_0904991106SI.pdf]

**Table S1. Dataset size, outgroup, and best-fit clock model for each gene segment**

| Dataset     | No. of Viruses | Length | Outgroup*   | Best-Fit Clock Model |
|-------------|----------------|--------|-------------|----------------------|
| H1-HA       | 245            | 1698   | H2 subtype  | uced <sup>†</sup>    |
| H2-HA       | 144            | 1686   | H1 subtype  | uced                 |
| H3-HA       | 302            | 1698   | H4 subtype  | uced                 |
| N1-NA       | 238            | 1410   | N4 subtype  | uced                 |
| N2-NA       | 323            | 1404   | N3 subtype  | uced                 |
| PB2         | 294            | 2277   | Influenza B | uced                 |
| PB1         | 318            | 2271   | Influenza B | uced                 |
| PA          | 259            | 2148   | Influenza B | uced                 |
| NP          | 192            | 1476   | Influenza B | uced                 |
| M           | 265            | 756    | Influenza B | uced                 |
| NS allele B | 189            | 690    | NS allele A | uced                 |

\*Outgroup used to determine basal tree topology.

<sup>†</sup>Uncorrelated exponential clock (uced) model

**Table S2. Bayes factors were estimate by comparing the marginal likelihoods for each of the 3 clock models—strict clock, uncorrelated exponential relaxed clock (uecd), and uncorrelated lognormal relaxed clock (uclد)—for the H1-HA, N1-NA, PB2, PB1, PA, NP, M, NS, H2-HA, N2-NA, and H3-HA genes**

| Gene_clock | ln P(model   data) | SE    | H1_strict  | H1_uced   | H1_uclد  |
|------------|--------------------|-------|------------|-----------|----------|
| H1_strict  | −35748.572         | 0.476 | −          | −1032.911 | −990.337 |
| H1_uced    | −34715.661         | 0.645 | 1032.911   | −         | 42.574   |
| H1_uclد    | −34758.235         | 0.685 | 990.337    | −42.574   | −        |
| Gene_clock | ln P(model   data) | ± SE  | N1_strict  | N1_uced   | N1_uclد  |
| N1_strict  | −23873.2           | 0.492 | −          | −336.032  | −297.846 |
| N1_uced    | −23537.2           | 0.565 | 336.032    | −         | 38.186   |
| N1_uclد    | −23575.4           | 0.835 | 297.846    | −38.186   | −        |
| Gene_clock | ln P(model   data) | ± SE  | PB2_strict | PB2_uced  | PB2_uclد |
| PB2_strict | −50702.563         | 0.596 | −          | −548.82   | −533.421 |
| PB2_uced   | −50153.744         | 0.539 | 548.82     | −         | 15.399   |
| PB2_uclد   | −50169.142         | 0.721 | 533.421    | −15.399   | −        |
| Gene_clock | ln P(model   data) | ± SE  | PB1_strict | PB1_uced  | PB1_uclد |
| PB1_strict | 50587.2            | 0.489 | −          | −463.464  | −437.377 |
| PB1_uced   | 50123.7            | 0.825 | 463.464    | −         | 26.087   |
| PB1_uclد   | 50149.8            | 1.021 | 437.377    | −26.087   | −        |
| Gene_clock | ln P(model   data) | ± SE  | PA_strict  | PA_uced   | PA_uclد  |
| PA_strict  | −41906.1           | 0.499 | −          | −574.653  | −535.262 |
| PA_uced    | −41331.5           | 0.71  | 574.653    | −         | 39.391   |
| PA_uclد    | −41370.8           | 0.649 | 535.262    | −39.391   | −        |
| Gene_clock | ln P(model   data) | ± SE  | NP_strict  | NP_uced   | NP_uclد  |
| NP_strict  | −26763.351         | 0.437 | −          | −311.363  | −290.631 |
| NP_uced    | −26451.988         | 0.563 | 311.363    | −         | 20.732   |
| NP_uclد    | −26472.72          | 0.475 | 290.631    | −20.732   | −        |
| Gene_clock | ln P(model   data) | ± SE  | M_strict   | M_uced    | M_uclد   |
| M_strict   | −13475.974         | 0.575 | −          | −245.448  | −220.641 |
| M_uced     | −13230.525         | 0.778 | 245.448    | −         | 24.807   |
| M_uclد     | −13255.333         | 0.647 | 220.641    | −24.807   | −        |
| Gene_clock | ln P(model   data) | ± SE  | NSB_strict | NSB_uced  | NSB_uclد |
| NS_strict  | −10916.772         | 0.513 | −          | −213.301  | −198.515 |
| NS_uced    | −10703.471         | 0.675 | 213.301    | −         | 14.785   |
| NS_uclد    | −10718.256         | 0.52  | 198.515    | −14.785   | −        |
| Gene_clock | ln P(model   data) | ± SE  | H2_strict  | H2_uced   | H2_uclد  |
| H2_strict  | −15657.0           | 0.451 | −          | −138.822  | −126.274 |
| H2_uced    | −15518.2           | 0.578 | 138.822    | −         | 12.548   |
| H2_uclد    | −15530.8           | 0.48  | 126.274    | −12.548   | −        |
| Gene_clock | ln P(model   data) | ± SE  | N2_strict  | N2_uced   | N2_uclد  |
| N2_strict  | −31805.185         | 0.655 | −          | −537.032  | −502.949 |
| N2_uced    | −31268.153         | 0.663 | 537.032    | −         | 34.082   |
| N2_uclد    | −31302.236         | 0.792 | 502.949    | −34.082   | −        |
| Gene_clock | ln P(model   data) | ± SE  | H3_strict  | H3_uced   | H3_uclد  |
| H3_strict  | −32456.128         | 0.528 | −          | −617.834  | −593.74  |
| H3_uced    | −31838.294         | 0.676 | 617.834    | −         | 24.094   |
| H3_uclد    | −31862.388         | 0.696 | 593.74     | −24.094   | −        |
